# Supplementary material for: Identification of Key Antioxidants of Free, Esterified, and Bound Phenolics in Walnut Kernel and Skin
Source: MDPI journal article supplement (doi:10.3390/foods12040825), 2023-02-15

Table S1 Mass spectrometry parameters of 37 phenolic compounds for multiple reactions monitoring (MRM)

| Compounds                     | CAS<br>number | Retention time<br>(min) | Qualitative ions<br>(m/z)   | LOD<br>(µg/g) | LOQ<br>(µg/g) | Polarity |
|-------------------------------|---------------|-------------------------|-----------------------------|---------------|---------------|----------|
| Ellagic acid                  | 476-66-4      | 1.755                   | 301.2/257*, 301.22/271      | 0.142         | 0.474         | Negative |
| Gallic acid                   | 149-91-7      | 0.939                   | 168.99/125*, 168.99/79.1    | 0.1755        | 0.585         | Negative |
| Ferulic acid                  | 1135-24-6     | 1.944                   | 192.99/134.1*, 192.99/178.1 | 0.0458        | 0.153         | Negative |
| Caffeic acid                  | 331-39-5      | 1.357                   | 178.99/135.1*               | 0.141         | 0.471         | Negative |
| Sinapic acid                  | 530-59-6      | 1.916                   | 222.99/208.1*, 222.99/149.1 | 0.0244        | 0.0815        | Negative |
| Vanillic acid                 | 121-34-6      | 1.876                   | 169.01/93.1*, 169.01/65.2   | 1.76          | 5.88          | Positive |
| Syringic acid                 | 530-57-4      | 1.464                   | 196.99/182.1*, 196.99/123   | 0.246         | 0.820         | Negative |
| Protocatechuic acid           | 99-50-3       | 1.220                   | 155.01/93*, 155.01/65.2     | 1.36          | 4.55          | Positive |
| Cinnamic acid                 | 500-05-5      | 6.081                   | 149.01/131.1*, 149.01/103.1 | 0.484         | 1.62          | Positive |
| <i>p</i> -Hydroxybenzoic acid | 99-96-7       | 1.648                   | 176.96/133*, 176.96/57.1    | 2.50          | 8.33          | Positive |
| Chlorogenic acid              | 327-97-9      | 1.426                   | 355.01/163*, 180.9/145.1    | 0.0207        | 0.0689        | Positive |
| <i>p</i> -Coumaric acid       | 501-98-4      | 1.076                   | 138.99/95.1*, 138.99/51.2   | 0.0156        | 0.0522        | Negative |
| (+)-Catechin                  | 7295-85-4     | 1.453                   | 291.01/139*, 291.01/123     | 0.0917        | 0.306         | Positive |
| Epicatechin                   | 490-46-0      | 1.823                   | 291.01/139*, 291.01/123     | 0.0608        | 0.203         | Positive |

|                                   |             |       |                             |         |         |          |
|-----------------------------------|-------------|-------|-----------------------------|---------|---------|----------|
| (-)-gallocatechin                 | 3371-27-5   | 0.762 | 307.01/139*, 307.01/151.1   | 0.00974 | 0.0325  | Positive |
| Epigallocatechin gallate          | 989-51-5    | 1.794 | 459.01/139*, 459.01/289.1   | 0.00487 | 0.0162  | Positive |
| (-)-Gallocatechin gallate         | 4233-96-9   | 1.912 | 459/139*, 459/289.1         | 0.00224 | 0.00746 | Positive |
| (-)-Epicatechin gallate           | 1257-08-5   | 2.342 | 443.01/123.1*, 443.01/139.1 | 0.0524  | 0.175   | Positive |
| (-)-Epigallocatechin              | 970-74-1    | 1.208 | 307.01/139*, 307.01/151.1   | 0.0147  | 0.0492  | Positive |
| Catechin gallate                  | 130405-40-2 | 2.710 | 443.01/123.1*, 443.01/139.1 | 0.00078 | 0.00260 | Positive |
| Rutin                             | 153-18-4    | 2.690 | 611.01/303.1*, 611.01/465.1 | 0.00376 | 0.0126  | Positive |
| Quercetin-3-o-rutinoside          | 949926-49-2 | 2.405 | 611.01/287.1*, 611.01/449.2 | 0.00145 | 0.00484 | Positive |
| Quercetin-7-O-β-D-glucopyranoside | 491-50-9    | 2.834 | 465.39/303.1*               | 0.0162  | 0.0539  | Positive |
| Quercetin-3-O-glucopyranoside     | 482-35-9    | 2.909 | 465.01/303.1*, 465.01/85.1  | 0.0133  | 0.0444  | Positive |
| Quercetin                         | 117-39-5    | 3.383 | 301.23/151*, 301.23/179.1   | 0.00624 | 0.0208  | Negative |
| Dihydroquercetin                  | 480-18-2    | 2.973 | 305.3/259.1*, 305.3/153     | 0.0217  | 0.0722  | Positive |
| Dihydrokaempferol                 | 480-20-6    | 3.966 | 289.26/153*, 289.26/215.1   | 0.00891 | 0.0297  | Positive |
| Kaempferol                        | 520-18-3    | 3.600 | 287.01/153.1*, 287.01/121   | 0.00671 | 0.0224  | Positive |
| Kaempferol-3-O-glucosylside       | 480-10-4    | 3.604 | 449.39/287.1*, 449.39/89.1  | 0.00557 | 0.0186  | Positive |
| Naringenin                        | 67604-48-2  | 6.902 | 273.26/153*, 273.26/115.1   | 0.00752 | 0.0251  | Positive |
| Vitexin                           | 3681-93-4   | 2.728 | 433.01/313.1*, 433.01/415.1 | 0.00404 | 0.0135  | Positive |

|                |            |       |                           |         |         |          |
|----------------|------------|-------|---------------------------|---------|---------|----------|
| Procyanidin B2 | 29106-49-8 | 1.515 | 579.53/127,579.53/291     | 0.0338  | 0.113   | Positive |
| juglone        | 481-39-0   | 5.626 | 173.14/145*               | 0.0915  | 0.305   | Negative |
| Dendrobine     | 2115-91-5  | 0.967 | 286.37/226*,286.37/250    | 0.0349  | 0.116   | Positive |
| Cumallic acid  | 500-05-0   | 1.074 | 139.08/95,139.08/51.2     | 0.0168  | 0.0559  | Negative |
| Lycorine       | 476-28-8   | 0.762 | 288.37/176.9,288.37/147   | 0.00057 | 0.00188 | Positive |
| Luteolin       | 491-70-3   | 5.803 | 287.25/153*, 287.25/135.1 | 0.0137  | 0.0457  | Positive |

---

\* quantitative ion

Figure S1. Total ions chromatograph (TIC) obtained at negative (A) and positive (B) MS ionization for standards of phenolic compounds

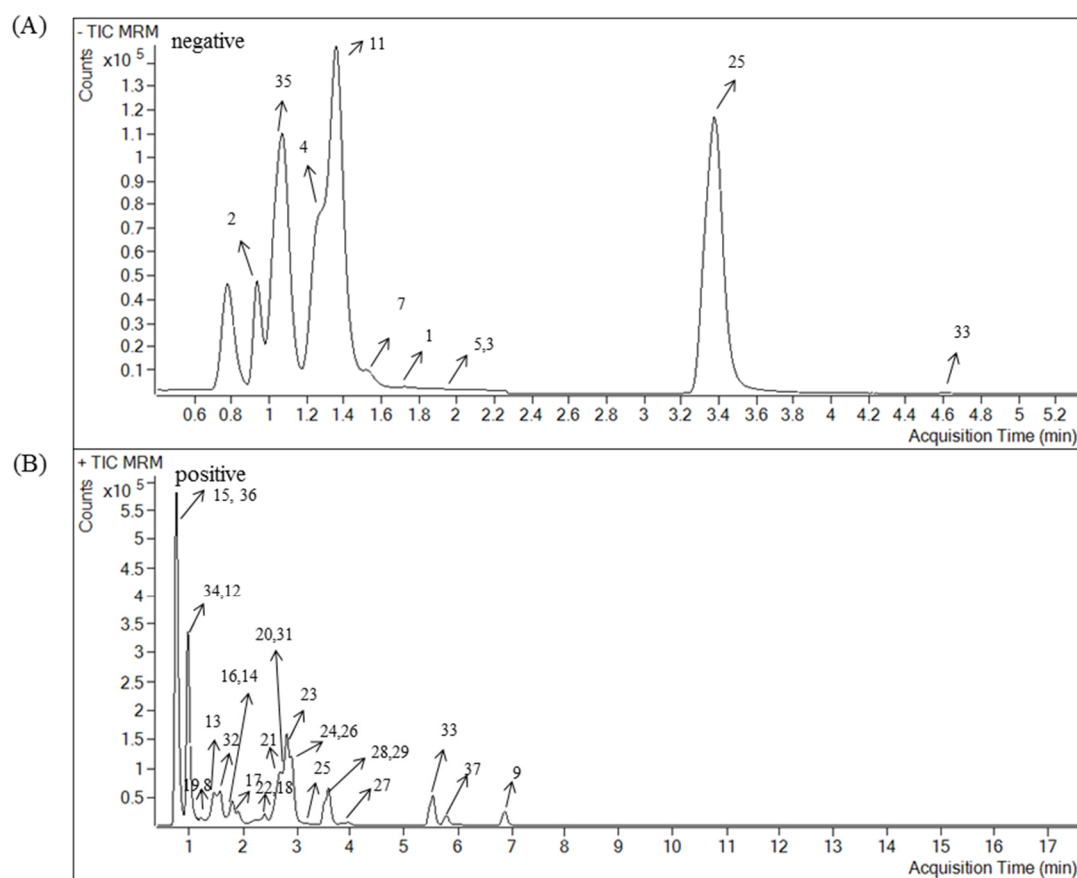

1 Ellagic acid, 2 Gallic acid, 3 Ferulic acid, 4 Caffeic acid, 5 Sinapic acid, 6 Vanillic acid, 7 Syringic acid, 8 Protocatechuic acid, 9 Cinnamic acid, 10 *p*-Hydroxybenzoic acid, 11 Chlorogenic acid, 12 *p*-Coumaric acid, 13 (+)-Catechin, 14 Epicatechin, 15 (-)-gallocatechin, 16 Epigallocatechin gallate, 17 (-)-Gallocatechin gallate, 18 (-)-Epicatechin gallate, 19 (-)-Epigallocatechin, 20 Catechin gallate, 21 Rutin, 22 Quercetin-3-o-rutinoside, 23 Quercetin-7-O- $\beta$ -D-glucopyranoside, 24 Quercetin-3-O-glucopyranoside, 25 Quercetin, 26 Dihydroquercetin, 27 Dihydrokaempferol, 28 Kaempferol, 29 Kaempferol-3-O-glucosylsides, 30 Naringenin, 31 Vitexin, 32 Procyanidin B2, 33 juglone, 34 Dendrobine, 35 Cumallic acid, 36 Lycorine, 37 Luteolin

Figure S2. Typical chromatograms obtained at negative (A) and positive (B) MS ionization for standards of phenolic compounds

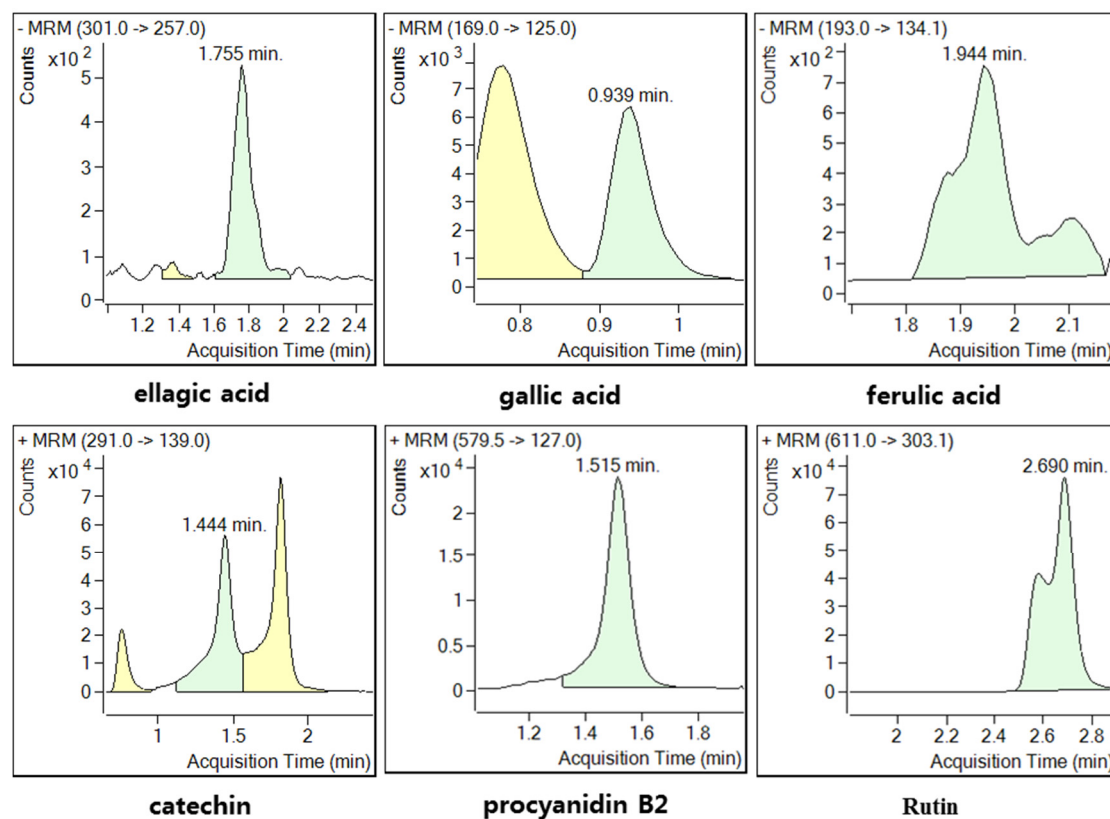

Supplement: s1 [file s1]
